# Supplementary material for: Longitudinal Assessment of Circulating Tumor Cells and Outcome in Small Cell Lung Cancer: A Sub-Study of RASTEN—A Randomized Trial with Low Molecular Weight Heparin
Source: MDPI journal article supplement (doi:10.3390/cancers15123176), 2023-06-13
Supplement: s1 [file s1]

**Supplementary Figure S1:** Longitudinal analysis of circulating tumor cells from baseline to chemotherapy cycle 3 and at 2-month follow-up, by study arm.

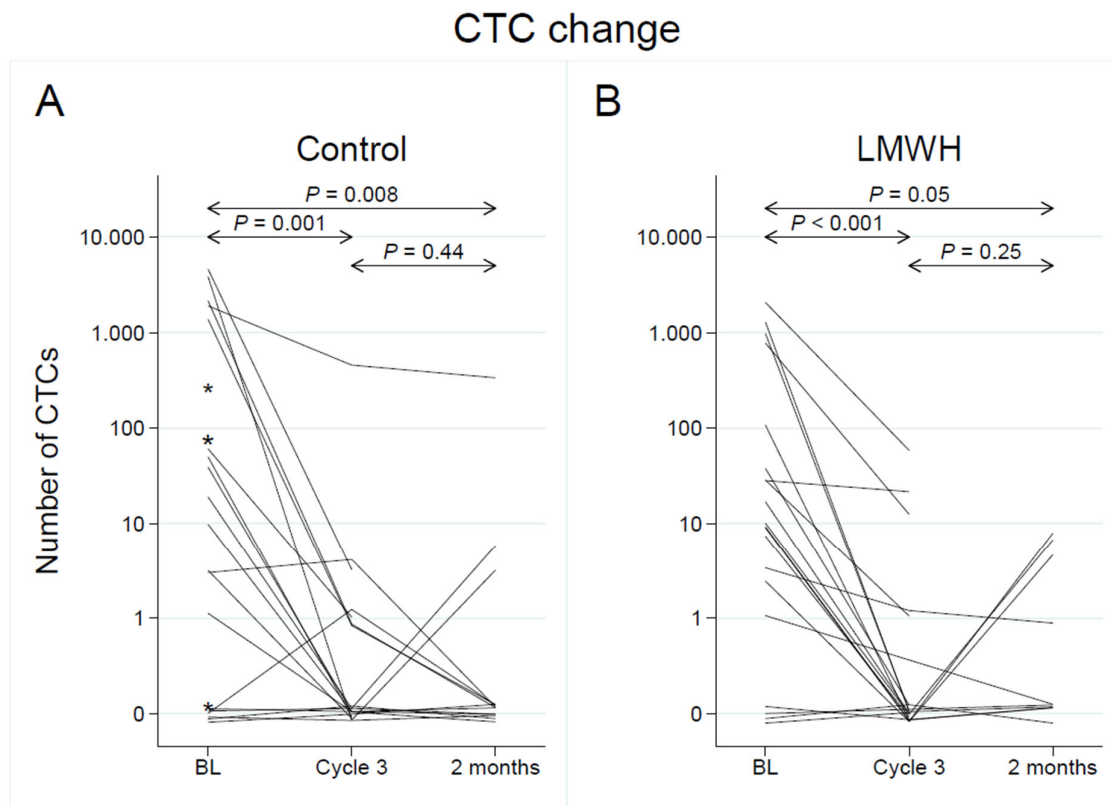

Panel A represents patients in the control arm ( $N=22$ ), while panel B displays patients in the LMWH arm ( $N=20$ ). Note: The y-axis scale is logarithmic, base 10. CTC counts of zero are plotted at  $y=0.1$  on this scale, a point which therefore has been labelled 0. CTC = circulating tumor cell. \*Patients where baseline samples only were available for analysis ( $N=3$ ).

**Supplementary Figure S2:** Kaplan-Meier analysis of overall survival by detection of baseline CTCs and by stage; limited (A) and extensive (B) disease.

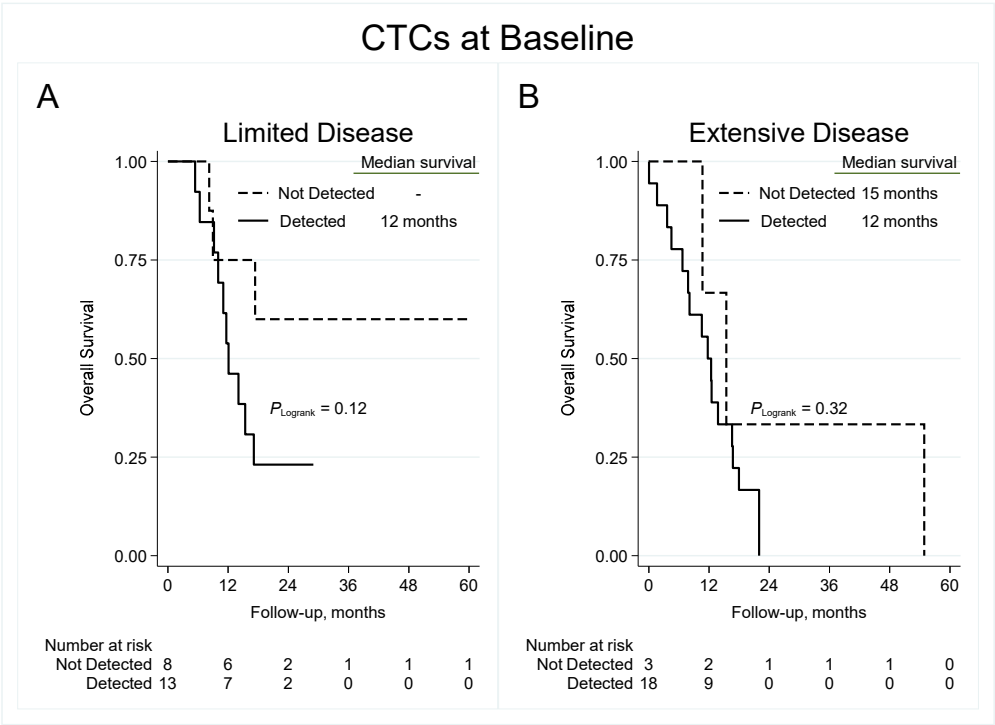

CTC = circulating tumor cell.

**Supplementary Table S1.** Study population baseline characteristics, by study arm.

|                                             | <b>LMWH<br/>N=20</b> | <b>Control<br/>N=22</b> |
|---------------------------------------------|----------------------|-------------------------|
| <b>Age, years</b>                           |                      |                         |
| Mean $\pm$ SD                               | 67 $\pm$ 7.6         | 64 $\pm$ 5.8            |
| <b>Gender, N (%)</b>                        |                      |                         |
| Female                                      | 12 (60)              | 11 (50)                 |
| Male                                        | 8 (40)               | 11 (50)                 |
| <b>Performance status, N (%)</b>            |                      |                         |
| 0-1                                         | 14 (70)              | 17 (77)                 |
| 2-3                                         | 6 (30)               | 5 (23)                  |
| <b>Disease stage, N (%)</b>                 |                      |                         |
| Limited disease                             | 11 (55)              | 10 (45)                 |
| Extensive disease                           | 9 (45)               | 12 (55)                 |
| <b>Number of chemotherapy cycles, N (%)</b> |                      |                         |
| < 4                                         | 1 (5)                | 1 (5)                   |
| $\geq$ 4                                    | 19 (95)              | 21 (95)                 |
| <b>Additional chemotherapy, N (%)</b>       |                      |                         |
| 1 subsequent line                           | 7 (35)               | 7 (32)                  |
| $\geq$ 2 subsequent lines                   | 1 (5)                | 2 (9)                   |
| No additional chemotherapy                  | 12 (60)              | 13 (59)                 |
| <b>Radiotherapy, N (%)*</b>                 |                      |                         |
| Prophylactic cranial                        | 13 (72)              | 15 (71)                 |
| Thoracic                                    | 12 (67)              | 13 (62)                 |
| Metastatic lesion                           | 4 (22)               | 5 (24)                  |
| No radiotherapy                             | 2 (11)               | 3 (14)                  |
| Missing                                     | 2                    | 1                       |

LMWH = Low-molecular-weight heparin; SD = Standard deviation.

\* Patients may have received radiotherapy towards more than one site.

**Supplementary Table S2.** Adjusted effects of CTC detection on overall survival at each time-point.

|                                | HR (95% CI)      | <i>P</i> -value |
|--------------------------------|------------------|-----------------|
| <b>Baseline</b>                |                  |                 |
| CTC = 0                        | 1 (ref.)         |                 |
| CTC $\geq$ 1                   | 2.11 (0.78-5.70) | 0.140           |
| <b>At chemotherapy cycle 3</b> |                  |                 |
| CTC = 0                        | 1 (ref.)         |                 |
| CTC $\geq$ 1                   | 2.26 (0.92-5.57) | 0.076           |
| <b>At 2-month follow-up</b>    |                  |                 |
| CTC = 0                        | 1 (ref.)         |                 |
| CTC $\geq$ 1                   | 2.31 (0.79-6.74) | 0.126           |

Adjusted for disease stage, age (linear), gender and performance status (0-1 vs. 2-3).  
 CTC = circulating tumor cell; HR = hazard ratio; CI = confidence interval.
